# Supplementary material
Source: publisher figshare collection journal article supplement (https://acs.figshare.com/ndownloader/files/3983743)
Supplement: Supplementary file 1 [file 3983743]

## Supporting Information

# Spatially Controlled Photochemical Peptide and Polymer Conjugation on Biosurfaces

*Thomas Tischer,<sup>†,#</sup> Tanja K. Claus,<sup>†,#</sup> Michael Bruns,<sup>§</sup> Vanessa Trouillet,<sup>§</sup> Katharina Linkert,<sup>‡</sup>  
Cesar Rodriguez-Emmenegger,<sup>†,#,§</sup> Anja S. Goldmann,<sup>†,#</sup> Sébastien Perrier,<sup>+</sup> Hans G. Börner<sup>‡</sup>  
and Christopher Barner-Kowollik<sup>†,#,\*</sup>*

<sup>†</sup> Preparative Macromolecular Chemistry, Institut für Technische Chemie und Polymerchemie,  
Karlsruhe Institute of Technology (KIT), Engesserstr. 18, 76128 Karlsruhe, Germany

<sup>#</sup> Institut für Biologische Grenzflächen (IBG), Karlsruhe Institute of Technology (KIT),  
Hermann-von-Helmholtz-Platz 1, 76344 Eggenstein-Leopoldshafen, Germany

<sup>§</sup> Institut für Angewandte Materialien (IAM) and Karlsruhe Nano Micro Facility (KNMF),  
Karlsruhe Institute of Technology (KIT), Hermann-von-Helmholtz-Platz 1, 76344 Eggenstein-  
Leopoldshafen, Germany

<sup>§</sup> Cell- and Neurobiology, Zoologisches Institut, Karlsruhe Institute of Technology (KIT), Haid-  
und-Neu-Str. 9, 76128 Karlsruhe, Germany

<sup>‡</sup> Department of Chemistry, Laboratory for Organic Synthesis of Functional Systems, Humboldt-  
Universität zu Berlin, D-12489 Berlin, Germany

<sup>+</sup> Key Centre for Polymers & Colloids, School of Chemistry, The University of Sydney, NSW,  
2006, Australia

\*corresponding author: christopher.barner-kowollik@kit.edu

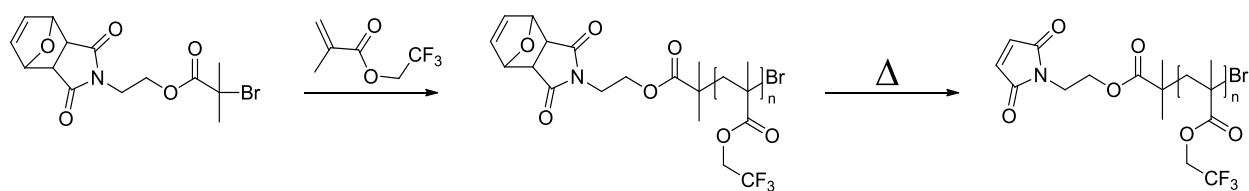

**Figure S1.** Synthetic route for the synthesis of MI-PTFEMA.

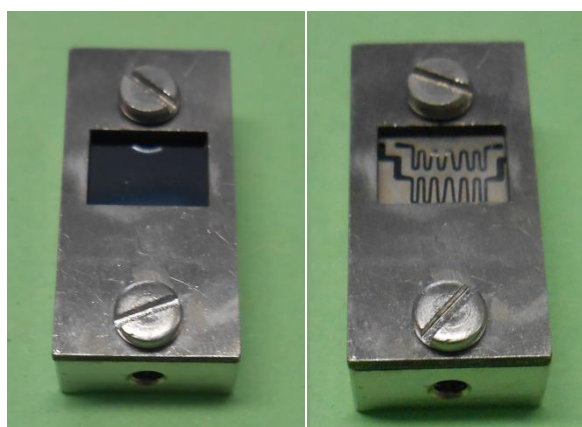

**Figure S2.** Optical images of the employed sample holder (left) including the employed meander mask (right).

**Table S1.** Elemental composition of the biosurfaces determined via XPS analysis

| Substrate/At. %               | C1s   | N1s | O1s  | F1s |
|-------------------------------|-------|-----|------|-----|
| Si-NH <sub>2</sub>            | 43.90 | 8.1 | 25.5 | -   |
| <b>1</b>                      | 32.5  | 3.8 | 39.6 | -   |
| <b>2</b>                      | 60.6  | 4.8 | 29.0 | -   |
| PTFEMA-HA non irradiated      | 40.8  | 3.5 | 33.5 | -   |
| PTFEMA-HA irradiated          | 43.0  | 3.1 | 30.7 | 1.4 |
| GIGKFLHS-g-HA irradiated      | 64.2  | 7.8 | 27.6 | -   |
| GIGKFLHS-g-HA non irradiated  | 63.2  | 8.0 | 28.8 | -   |
| <b>1'</b>                     | 57.3  | -   | 42.7 | -   |
| <b>2'</b>                     | 62.8  | 1.0 | 36.2 | -   |
| PTFEMA-Cel non irradiated     | 59.3  | -   | 40.7 | -   |
| PTFEMA-Cel irradiated         | 57.1  | 0.4 | 34.4 | 8.1 |
| GIGKFLHS-g-Cel irradiated     | 60.2  | 3.1 | 36.7 | -   |
| GIGKFLHS-g-Cel non irradiated | 58.9  | -   | 41.1 | -   |

**Table S2** Layer thicknesses of **2** determined via ellipsometry

| Layer            | Thickness [nm] |
|------------------|----------------|
| SiO <sub>2</sub> | 6.6 ± 0.8      |
| APTES            | 6.8 ± 0.4      |
| HA               | 7.2 ± 1.0      |

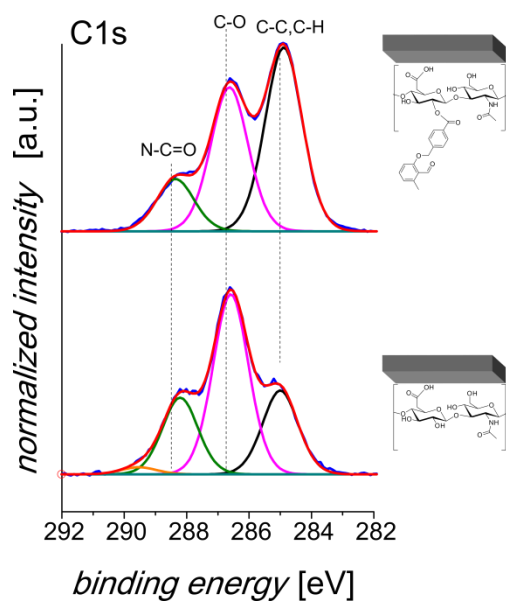

**Figure S3.**Top: C1s spectrum of PE-HA Bottom: C1s spectrum of the control experiment without PE present, clearly evidencing the introduction of PE moieties on the surface due to the increase of C-C/C-H species at 285.0 eV

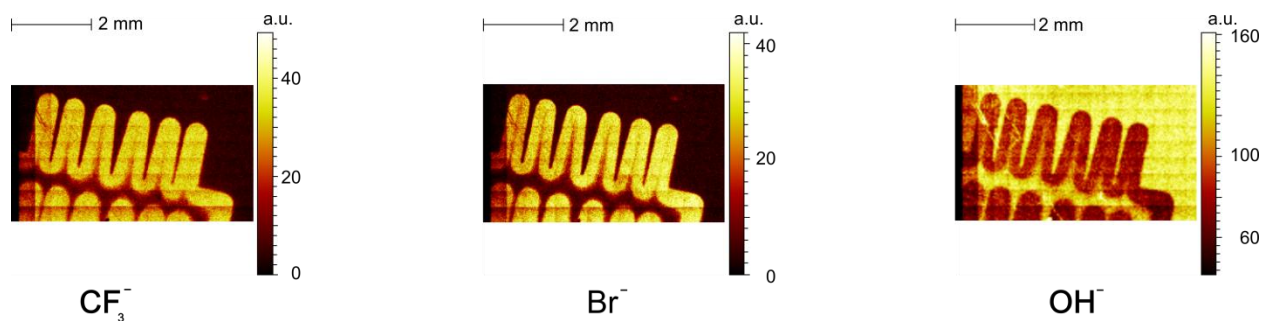

**Figure S4.** ToF-SIMS images of PTFEMA-g-HA (spincoated): Mapping of  $-\text{CF}_3$  associated with the TFEMA monomer unit (left), mapping of bromine associated with the end functionality of PTFEMA (middle), mapping of hydroxy groups associated with hyaluronic acid (right) clearly evidencing the spatially controlled functionalization of the PE-HA film.

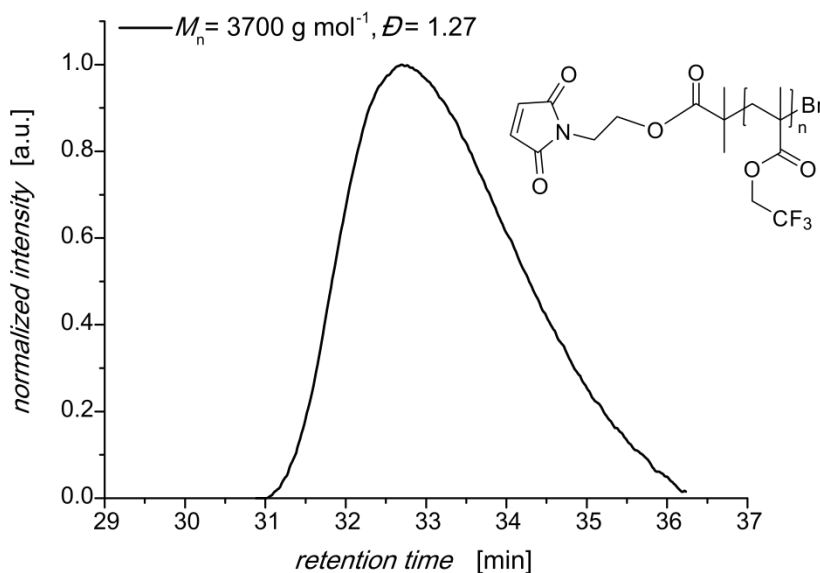

**Figure S5.** Molecular weight distribution of maleimide terminated PTFEMA in an SEC experiment employing THF as eluent. The values obtained for  $M_n$  and the polydispersity correspond to a PMMA calibration.

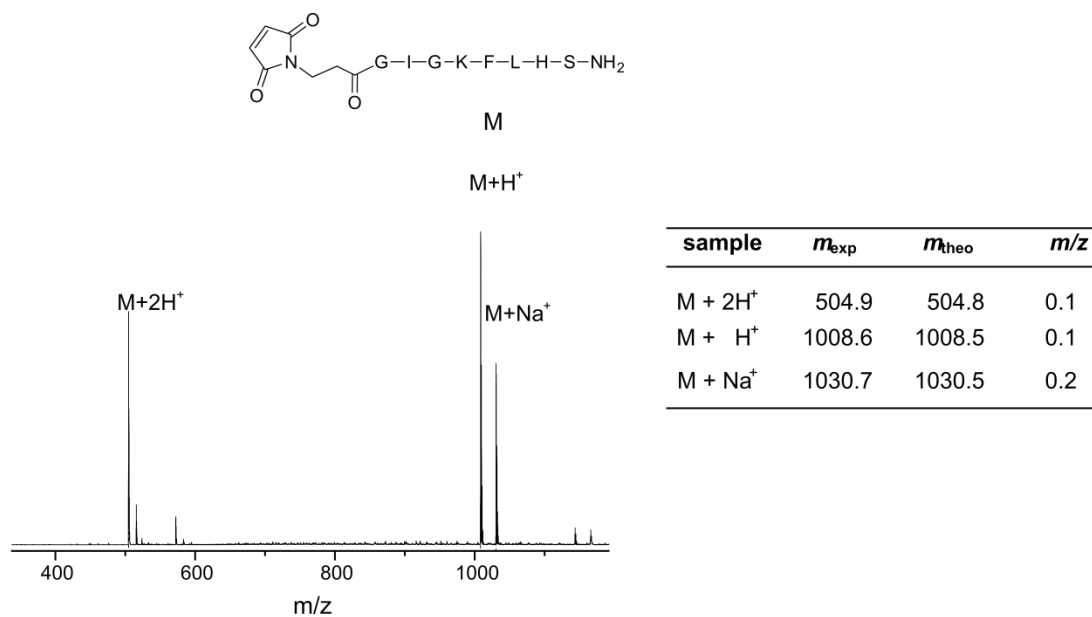

**Figure S5.** Left: ESI-MS spectra of the model peptide (M,  $m/z$ = 1007.5 Da); Right: Table of theoretical and experimental  $m/z$  corresponding to the model peptide.
